# Supplementary material for: Gene set enrichment analysis for non-monotone association and multiple experimental categories
Source: Springer Nature journal article supplement (doi:10.1186/1471-2105-9-481), 2008-11-14
Supplement: 12859_2007_2466_MOESM4_ESM.pdf [file 12859_2007_2466_MOESM4_ESM.pdf]

Associations between genes  
in the identified set

*glycolysis and gluconeogenesis*

for liver data

# liver: glycolysis and gluconeogenesis

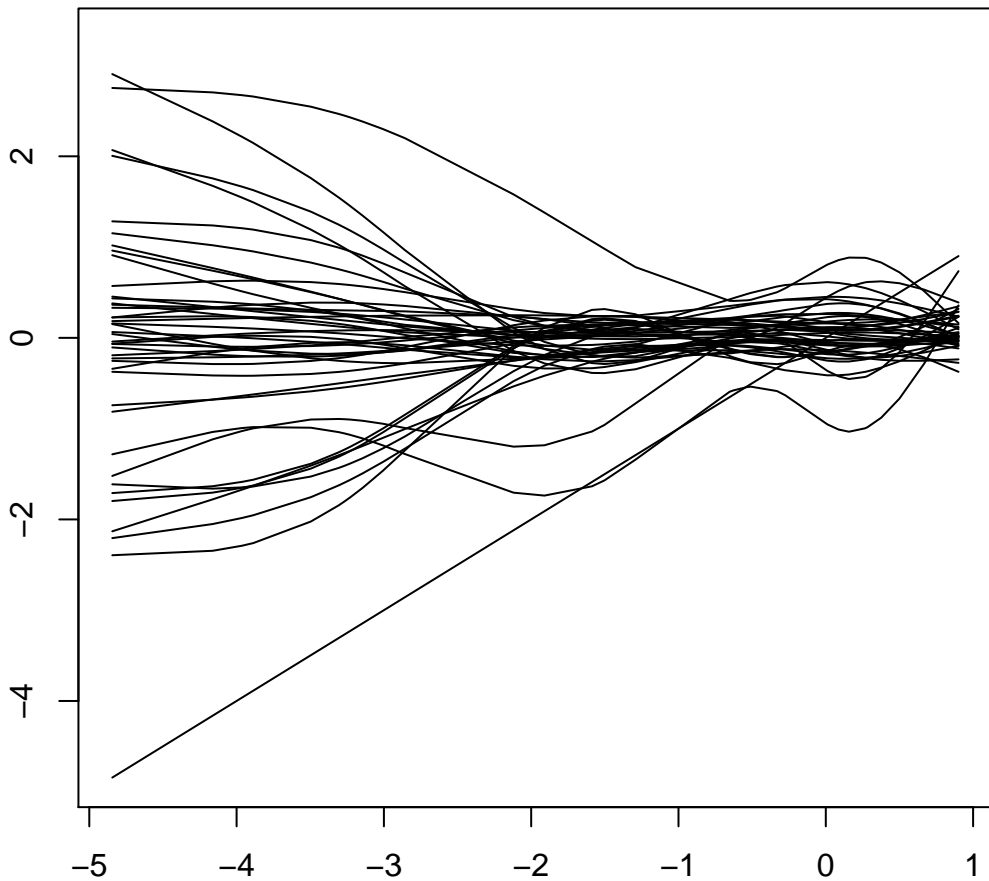

A\_43\_P11710 G6pc  
Brom

# liver: glycolysis and gluconeogenesis

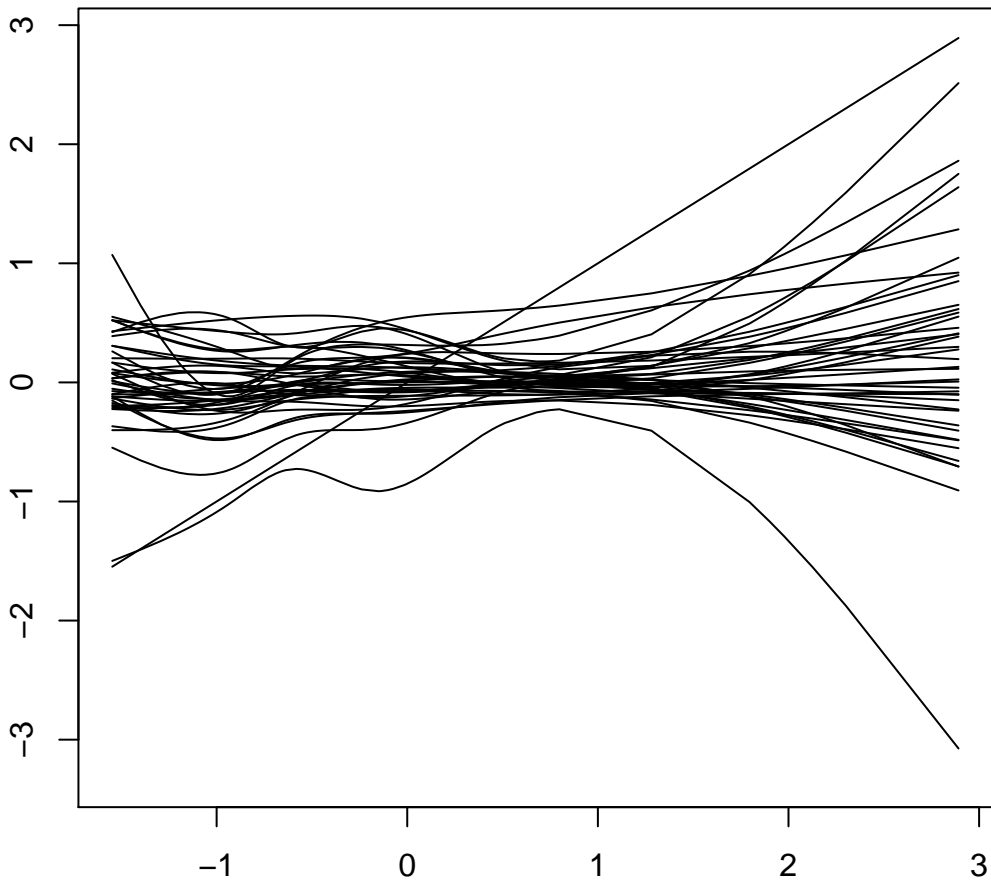

A\_43\_P11710 G6pc

Diqu

# liver: glycolysis and gluconeogenesis

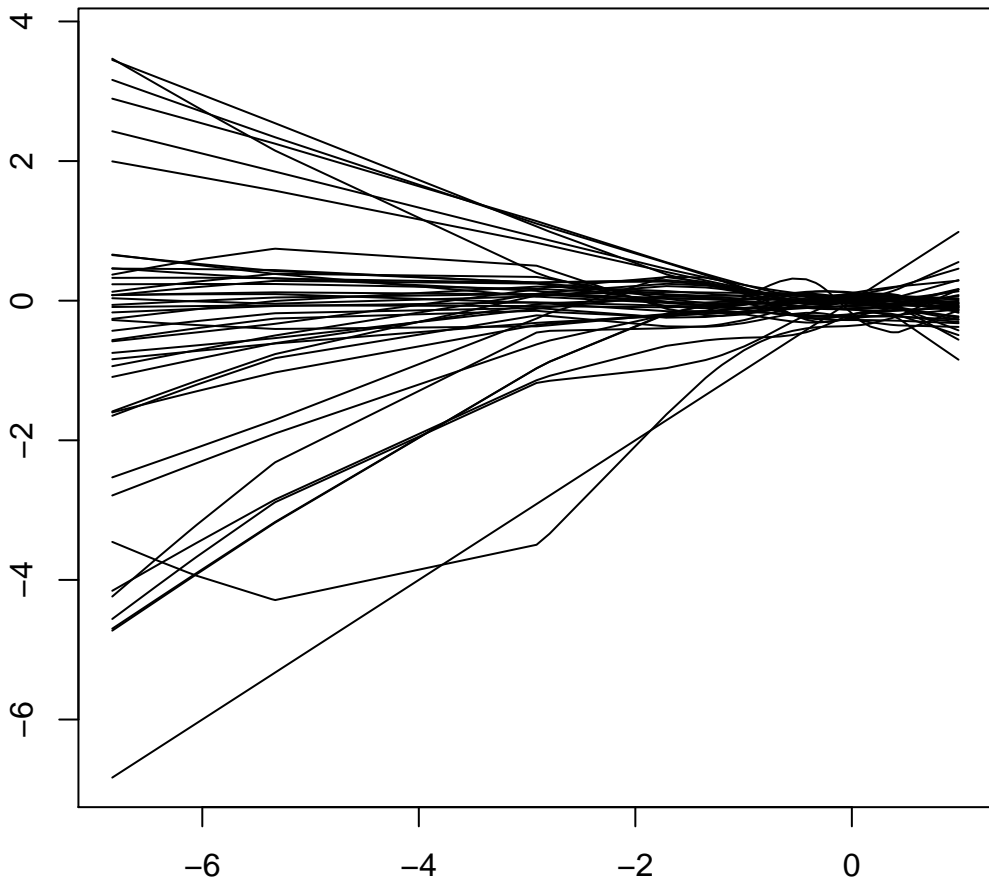

A\_43\_P11710 G6pc  
Gala

# liver: glycolysis and gluconeogenesis

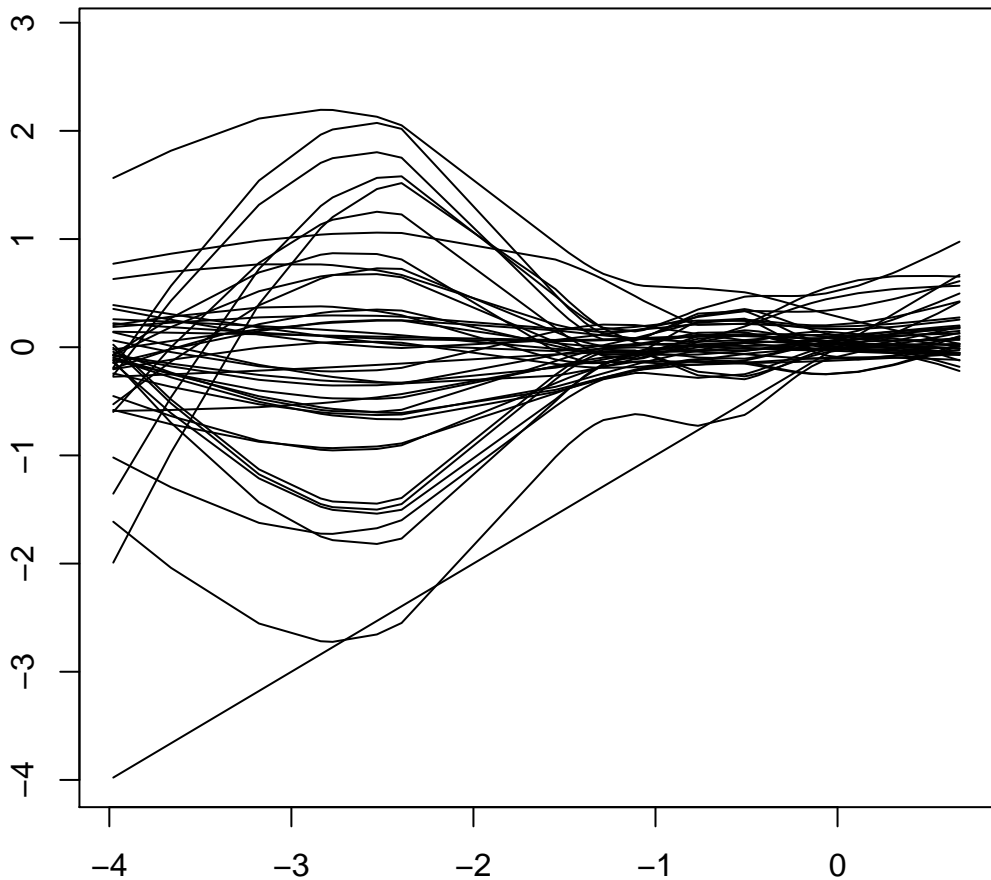

A\_43\_P11710 G6pc  
Mono

# liver: glycolysis and gluconeogenesis

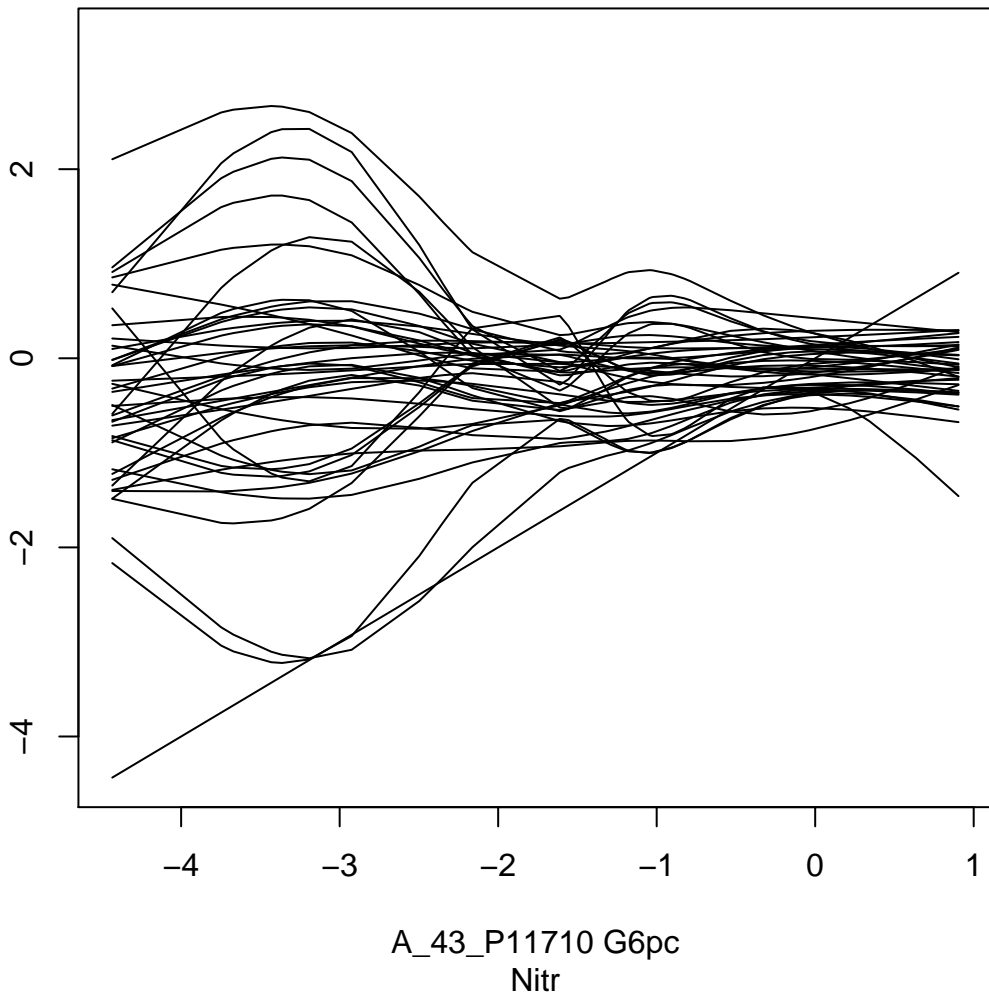

# liver: glycolysis and gluconeogenesis

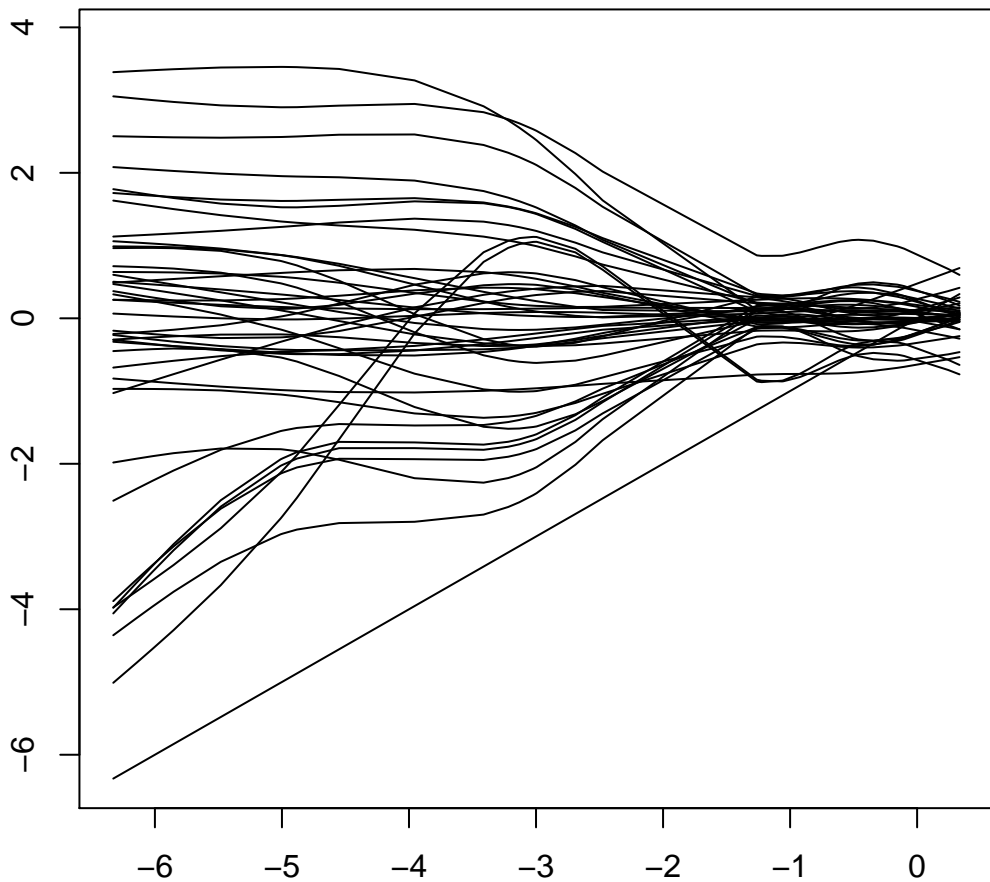

A\_43\_P11710 G6pc  
Thio

# liver: glycolysis and gluconeogenesis

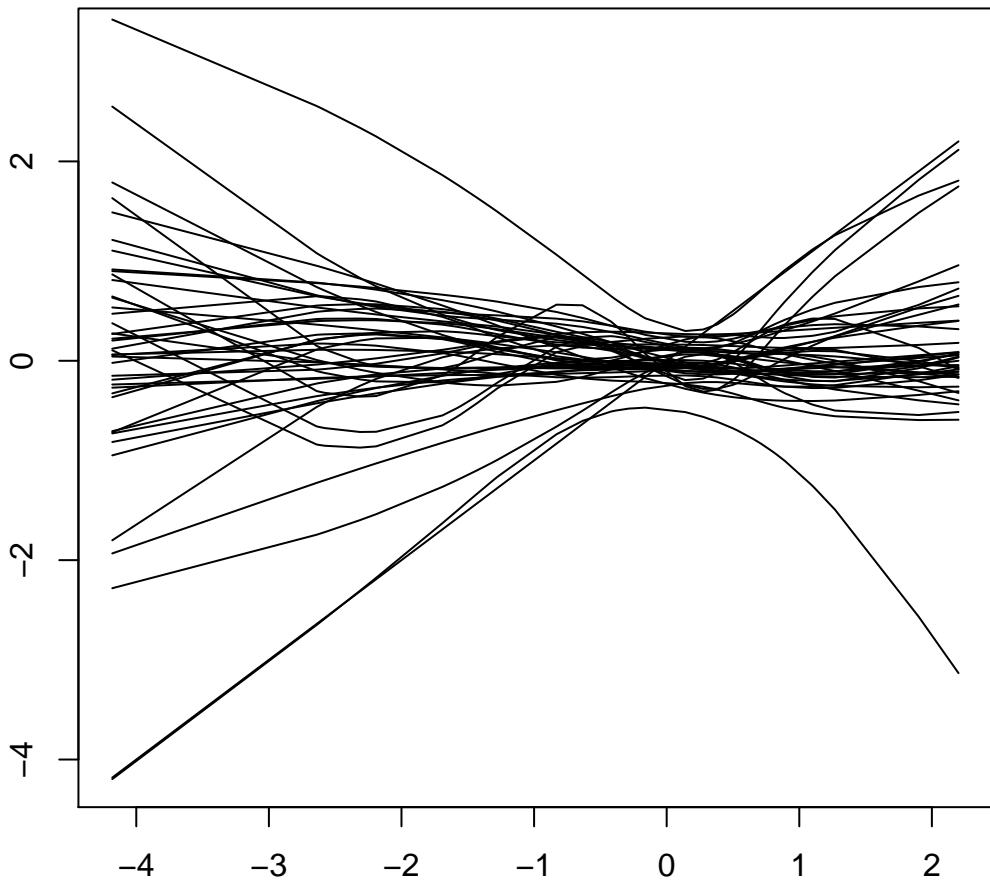

A\_43\_P11710 G6pc  
1.2.Dich



# liver: glycolysis and gluconeogenesis

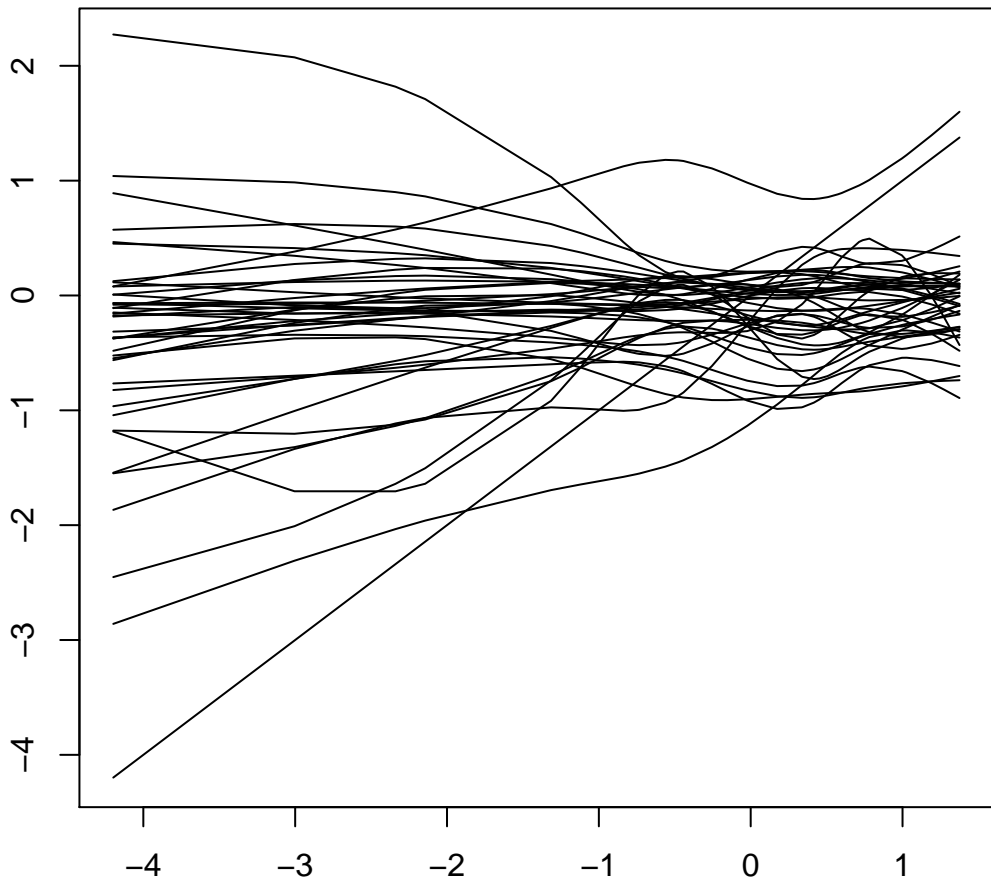

A\_43\_P11710 G6pc  
1.4.Dich
