# Supplementary material for: Gene set enrichment analysis for non-monotone association and multiple experimental categories
Source: Springer Nature journal article supplement (doi:10.1186/1471-2105-9-481), 2008-11-14

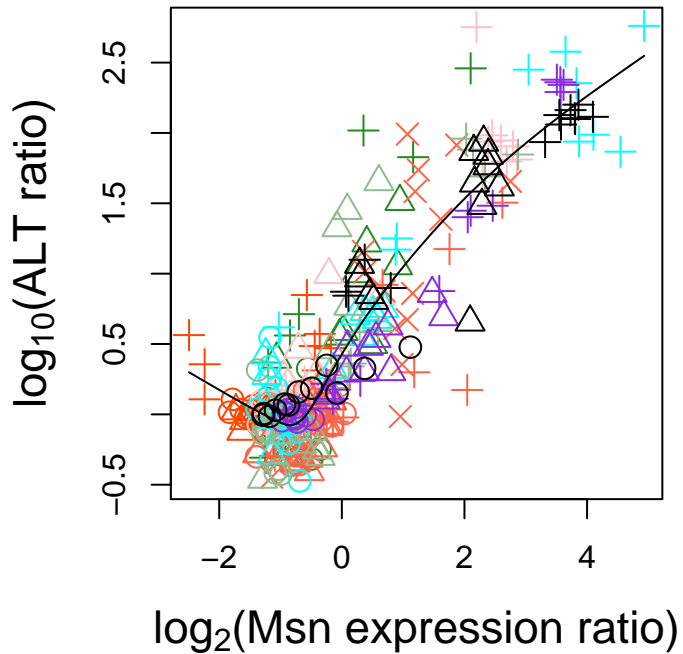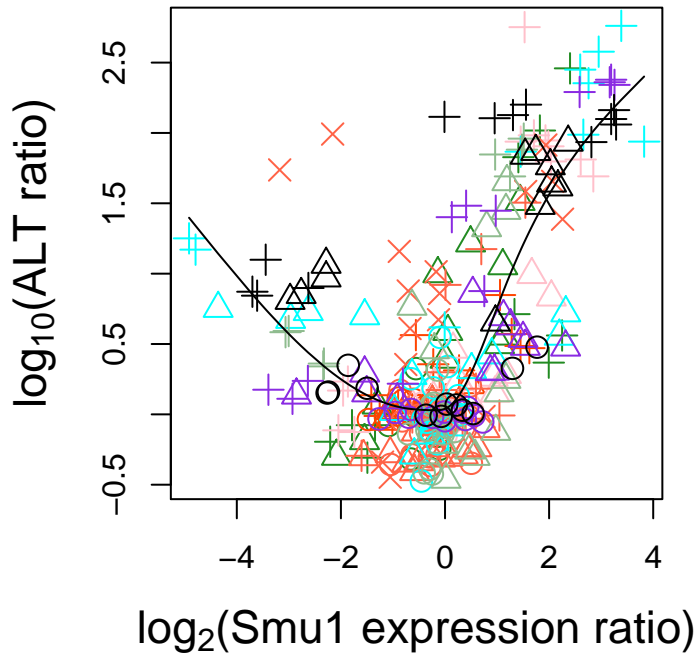

Supplement: 12859_2007_2466_MOESM5_ESM.pdf [file 12859_2007_2466_MOESM5_ESM.pdf]
